# Supplementary material for: Spinal epidural hematoma without significant trauma in children: two case reports and review of the literature
Source: Springer Nature journal article supplement (doi:10.1186/s12887-020-1957-x), 2020-02-19
Supplement: MOESM1 [file 17724790]

### Appendix 1. Alphabetical list of Authors of Articles Included in the Review and Summary of Study Design and Findings

| Study                        | Level of Evidence | Research Design | Number of Cases/Number of Episodes; Case Series: Number Included | Sex | Age (Months)<br>Case Series: Median Age/Age Range | Symptoms at Diagnosis                                                    | Location                              | Risk Factors                              | Treatment                           | Outcome                            |
|------------------------------|-------------------|-----------------|------------------------------------------------------------------|-----|---------------------------------------------------|--------------------------------------------------------------------------|---------------------------------------|-------------------------------------------|-------------------------------------|------------------------------------|
| Abbas et al <sup>1</sup>     | V                 | Case report     | 1                                                                | M   | 5                                                 | Irritability, torticollis, upper limb paraplegia, lower limb paraparesis | C4-C7, anterior                       | Trivial trauma (fall from 40 cm)          | Laminectomy                         | NA                                 |
| Abdelaal et al <sup>2</sup>  | V                 | Case report     | 1                                                                | M   | 60                                                | Torticollis, lower limb hyperreflexia                                    | C1-T8, posterior                      | Hemophilia A                              | Factor VIII + laminectomy           | No sequelae                        |
| Abram et al <sup>3</sup>     | V                 | Case report     | 1/3                                                              | F   | 120                                               | 100% paraplegia; 33% back pain, anesthesia                               | 1. NA<br>2. NA<br>3. C7-T1, posterior | 33% none, 66% NA                          | 66% conservatively; 33% laminectomy | Paraplegia and anesthesia below T5 |
| Agha et al <sup>4</sup>      | V                 | Case report     | 1                                                                | M   | 10                                                | Irritability, torticollis                                                | C1-L4, posterior                      | Hemophilia A                              | Factor VIII                         | No sequelae                        |
| Amyot et al <sup>5</sup>     | V                 | Case report     | 1                                                                | NA  | 22                                                | Torticollis, Erb palsy                                                   | C2-T1, posterior                      | Trivial trauma (fall from his own height) | Laminectomy                         | Left upper limb paresis            |
| Arya et al <sup>6</sup>      | V                 | Case report     | 1                                                                | F   | 12                                                | Irritability, lower limb paraplegia, upper limb paraparesis              | C2-C6, posterior                      | None                                      | Conservatively                      | Tetraparesis                       |
| Awada et al <sup>7</sup>     | V                 | Case report     | 1                                                                | M   | 168                                               | Torticollis, tetraplegia, anesthesia below C5, sphincter dysfunction     | C2-T2, posterior                      | None                                      | Laminectomy                         | Tetraplegia, anesthesia below C7   |
| Azumagawa et al <sup>8</sup> | V                 | Case report     | 1                                                                | M   | 144                                               | Torticollis, back pain, limb pain, left hand paresis                     | C4-T4, posterior                      | None                                      | Conservatively                      | No sequelae                        |

|                                      |    |             |      |          |            |                                                                                    |                                                   |                                                    |                                      |                  |
|--------------------------------------|----|-------------|------|----------|------------|------------------------------------------------------------------------------------|---------------------------------------------------|----------------------------------------------------|--------------------------------------|------------------|
| Balkan et al <sup>9</sup>            | V  | Case report | 1    | M        | 204        | Torticollis, back pain, tetraparesis, lower limb anesthesia, sphincter dysfunction | C6/7-T5 anterior, T5-T12 posterior                | Hemophilia B                                       | Factor IX                            | No sequelae      |
| Bisson et al <sup>10</sup>           | V  | Case report | 1    | M        | 84         | Torticollis, limb pain                                                             | C2-T3, anterior                                   | Hemophilia B                                       | Factor IX                            | No sequelae      |
| Blount et al <sup>11</sup>           | V  | Case report | 1    | M        | 0          | Tetraplegia at birth                                                               | C5-T6, posterior                                  | None                                               | Laminotomy                           | Tetraplegia      |
| Borkar et al <sup>12</sup>           | V  | Case report | 1    | M        | 60         | Back pain, paraparesis, hypoesthesia below L1, sphincter dysfunction               | L4-S2, anterior                                   | Hemophilia B                                       | Factor IX                            | No sequelae      |
| Cabral et al <sup>13</sup>           | V  | Case report | 1    | M        | 108        | Torticollis, back pain, paraplegia                                                 | C7-T4, posterior                                  | Arteriovenous malformation                         | Laminectomy                          | No sequelae      |
| Cakir et al <sup>14</sup>            | V  | Case report | 1    | F        | 108        | Limb pain, hypoesthesia under T3, paraplegia                                       | T2-T8, posterior                                  | Trivial trauma                                     | Laminectomy                          | No sequelae      |
| Caldarelli et al <sup>15</sup>       | IV | Case series | 2; 2 | 50% M, F | 18.5/16-24 | 100% hemiparesis; 50% irritability, torticollis, abdominal pain                    | 1. C4-C7, posterior<br>2. C5-T4, latero-posterior | 100% none                                          | 100% laminotomy                      | 100% no sequelae |
| Carrea et al <sup>16</sup>           | IV | Case series | 3; 1 | F        | 48         | Back pain, paraparesis, sphincter dysfunction                                      | T5-T10                                            | Trivial trauma (fall from his own height)          | Laminectomy                          | No sequelae      |
| Chang et al <sup>17</sup>            | V  | Case report | 1    | F        | 60         | Abdominal pain, torticollis, paraparesis, sphincter dysfunction                    | T6-T8, postero-lateral                            | None                                               | Laminectomy                          | No sequelae      |
| Chrétiennot-Bara et al <sup>18</sup> | IV | Case series | 2; 2 | 100% M   | 54/12-96   | 100% paresis; 50% abdominal pain, back pain, irritability, hypoesthesia            | 1. C7-L5, posterior<br>2. T11-L5                  | 100% coagulopathy (50% hemophilia B, hemophilia A) | 50% factor; 50% factor + laminectomy | 100% no sequelae |

|                               |    |             |      |          |               |                                                                                         |                      |                                                                             |                                           |                  |
|-------------------------------|----|-------------|------|----------|---------------|-----------------------------------------------------------------------------------------|----------------------|-----------------------------------------------------------------------------|-------------------------------------------|------------------|
| Cirek et al <sup>19</sup>     | V  | Case report | 1    | M        | 96            | Torticollis, tetraplegia                                                                | C3-C7, posterior     | None                                                                        | Laminectomy                               | No sequelae      |
| Cooper <sup>20</sup>          | V  | Case report | 1    | F        | 168           | Torticollis, tetraplegia, anesthesia below T5                                           | C3-C5                | None                                                                        | Laminectomy                               | No sequelae      |
| Cromwell et al <sup>21</sup>  | V  | Case report | 1    | M        | 18            | Irritability, torticollis, tetraparesis                                                 | C2-T8                | Hemophilia A + trivial trauma                                               | Factor VIII, laminectomy                  | Tetraparesis     |
| Cuvelier et al <sup>22</sup>  | V  | Case report | 1    | M        | 10            | Irritability, torticollis, upper paraplegia, lower paraparesis                          | C2-T8, posterior     | Hemophilia A                                                                | Factor VIII, laminectomy                  | No sequelae      |
| Dauch <sup>23</sup>           | V  | Case report | 1    | M        | 132           | Intermittent back pain, paraparesis                                                     | T1-T3, posterior     | None                                                                        | Laminectomy                               | Paraparesis      |
| Dawson <sup>24</sup>          | IV | Case series | 2; 2 | 50% M, F | 150 / 120-180 | 100% back pain; 50% tetraplegia, hypoesthesia                                           | 1. T2-T6<br>2. L2-L5 | 50% arteriovenous malformation, arteriovenous malformation + trivial trauma | 100% laminectomy                          | 100% no sequelae |
| Doymaz et al <sup>25</sup>    | V  | Case report | 1    | M        | 168           | Back pain, tetraplegia, anesthesia                                                      | C1-T2, anterior      | Coagulopathy                                                                | Laminectomy, transfusion                  | Tetraparesis     |
| Erkutlu et al <sup>26</sup>   | V  | Case report | 1    | M        | 60            | Irritability, torticollis, paraplegia, anesthesia in lower limbs, sphincter dysfunction | T9-T10, posterior    | Hemophilia A + trivial trauma                                               | Activated prothrombin complex concentrate | Paraparesis      |
| Fok et al <sup>27</sup>       | V  | Case report | 1    | M        | 15            | Torticollis, upper limb paraplegia, lower limb paraparesis                              | C3-T8, posterior     | None                                                                        | Laminectomy                               | No sequelae      |
| Fruchtman et al <sup>28</sup> | V  | Case report | 1    | M        | 6             | Irritability, pain                                                                      | T7-T10, posterior    | Hemophilia A                                                                | Factor VIII                               | No sequelae      |
| Gelabert et al <sup>29</sup>  | IV | Case series | 8; 1 | F        | 48            | Back pain, paraparesis                                                                  | T2-T5, posterior     | Angiolipoma                                                                 | Laminectomy                               | No sequelae      |
| Ghanem et al <sup>30</sup>    | V  | Case report | 1    | M        | 96            | Back pain, paraplegia, anesthesia,                                                      | T1-T3, posterior     | Trivial trauma (lifting weight)                                             | Laminectomy                               | No sequelae      |

|                                |    |             |      |    |     |                                                                                            |                   |                                   |                          |                                     |
|--------------------------------|----|-------------|------|----|-----|--------------------------------------------------------------------------------------------|-------------------|-----------------------------------|--------------------------|-------------------------------------|
|                                |    |             |      |    |     | sphincter dysfunction                                                                      |                   |                                   |                          |                                     |
| Grollmus <sup>31</sup>         | IV | Case series | 2; 1 | NA | 180 | Back pain, limb pain, tetraplegia                                                          | C6-T1, posterior  | None                              | Laminectomy              | No sequelae                         |
| Gupta et al <sup>32</sup>      | V  | Case report | 1    | M  | 72  | Torticollis, tetraparesis                                                                  | C3-T4             | Trivial trauma (blow on the neck) | Laminectomy              | No sequelae                         |
| Güzel et al <sup>33</sup>      | V  | Case report | 1    | F  | 168 | Back pain, upper paraparesis, lower paraplegia, anesthesia below T6, sphincter dysfunction | C4-T6, posterior  | Trivial trauma (convulsion)       | Laminectomy              | Paraparesis, sphincter dysfunction  |
| Hamre et al <sup>34</sup>      | V  | Case report | 1    | M  | 108 | Torticollis, back pain, paresis, hypoesthesia, sphincter dysfunction                       | C2/3-T6 anterior  | Hemophilia B                      | Factor IX                | No sequelae                         |
| Hasni Bouraoui <sup>35</sup>   | IV | Case series | 3; 1 | M  | 156 | Torticollis, back pain, paraparesis                                                        | T2-T6, posterior  | None                              | Laminectomy              | No sequelae                         |
| Heer et al <sup>36</sup>       | V  | Case report | 1    | M  | 144 | Torticollis, tetraparesis, sphincter dysfunction, anesthesia below T4                      | C5-C6, posterior  | Hemophilia A (unknown)            | Laminectomy, factor VIII | Tetraparesis, sphincter dysfunction |
| Helman <sup>37</sup>           | V  | Case report | 1    | M  | 16  | Irritability, torticollis, tetraparesis                                                    | C6-T9, posterior  | Trivial trauma                    | Laminectomy              | No sequelae                         |
| Horcajadas et al <sup>38</sup> | IV | Case series | 2; 1 | F  | 48  | Back pain, limb pain, torticollis, paraplegia, hypoesthesia, sphincter dysfunction         | T2-T4, posterior  | None                              | Laminectomy              | No sequelae                         |
| Hosoki et al <sup>39</sup>     | V  | Case report | 1    | M  | 11  | Irritability, torticollis, tetraparesis                                                    | T9-L1, posterior  | None                              | Laminectomy              | No sequelae                         |
| Hutt et al <sup>40</sup>       | V  | Case report | 1    | M  | 11  | Irritability, abdominal pain                                                               | T9-T12, posterior | Hemophilia A                      | Factor VIII              | No sequelae                         |

|                               |    |             |      |   |     |                                                                                          |                    |                        |                           |             |
|-------------------------------|----|-------------|------|---|-----|------------------------------------------------------------------------------------------|--------------------|------------------------|---------------------------|-------------|
| Iguchi et al <sup>41</sup>    | V  | Case report | 1    | F | 14  | Paraplegia                                                                               | T3-T6, posterior   | None                   | Laminectomy               | No sequelae |
| Iizuka et al <sup>42</sup>    | V  | Case report | 1    | M | 60  | Torticollis, back pain, tetraplegia                                                      | C2-T1, anterior    | Hemophilia A           | Factor VIII, laminoplasty | No sequelae |
| Irwin et al <sup>43</sup>     | V  | Case report | 1    | M | 10  | Irritability, torticollis, back pain, abdominal pain, paraparesis, sphincter dysfunction | C4-L1, posterior   | Hemophilia A           | Factor VIII, laminectomy  | No sequelae |
| Iwamuro et al <sup>44</sup>   | V  | Case report | 1    | M | 7   | Irritability, abdominal pain, paresis                                                    | T1-L1, posterior   | Hemophilia B           | Factor IX                 | No sequelae |
| Jackson <sup>45</sup>         | V  | Case report | 1    | F | 168 | Paraplegia                                                                               | C1-C7, anterior    | None                   | Autopsy                   | Death       |
| Jackson <sup>46</sup>         | V  | Case report | 1    | F | 168 | Paraparesis, lethargy                                                                    | T1-T5, posterior   | None                   | Laminectomy               | No sequelae |
| Johnston <sup>47</sup>        | V  | Case report | 1    | M | 60  | Abdominal pain, paraplegia                                                               | T9-T11 posterior   | Hemangioma             | Autopsy                   | Death       |
| Jones et al <sup>48</sup>     | IV | Case series | 3; 1 | M | 144 | Torticollis, back pain, paraplegia                                                       | C6-T1, posterior   | Hemophilia             | Laminectomy               | Paraplegia  |
| Joseph et al <sup>49</sup>    | V  | Case report | 1    | F | 204 | Back pain, paraplegia, hypoesthesia below T4, sphincter dysfunction                      | C7-T2, posterior   | None                   | Laminectomy               | Paraparesis |
| Jost et al <sup>50</sup>      | V  | Case report | 1    | M | 84  | Thoracic back pain                                                                       | T10-T11, posterior | Hemophilia B           | Factor IX                 | No sequelae |
| Jumani et al <sup>51</sup>    | V  | Case report | 1    | M | 24  | Torticollis, right hemiparesis                                                           | C4-T7, posterior   | None                   | Laminectomy               | No sequelae |
| Kalina et al <sup>52</sup>    | V  | Case report | 1    | M | 7   | Irritability, torticollis, paraparesis                                                   | C2-L4, posterior   | Hemophilia A (unknown) | Factor VIII               | No sequelae |
| Khursheed et al <sup>53</sup> | V  | Case report | 1    | M | 48  | Back pain, paraparesis, hypoesthesia below T7, sphincter dysfunction                     | T6-T8, posterior   | Hemophilia A           | Factor VIII, Laminotomy   | Paraparesis |

|                                |    |             |      |   |     |                                                                                 |                                                                 |                                      |                  |                                                     |
|--------------------------------|----|-------------|------|---|-----|---------------------------------------------------------------------------------|-----------------------------------------------------------------|--------------------------------------|------------------|-----------------------------------------------------|
| Khurshed et al <sup>54</sup>   | IV | Case series | 2; 2 |   |     | 100% hemiparesis, anesthesia, sphincter dysfunction; 50% back pain, torticollis | 1. T6-T8, posterior<br>2. C6-C7, posterior                      | 100% trivial trauma                  | 100% laminectomy | 50% no sequelae, paraparesis, sphincter dysfunction |
| Kiehna et al <sup>55</sup>     | V  | Case report | 1    | M | 5   | Irritability, torticollis, tetraparesis                                         | C1-conus, posterior                                             | Hemophilia A                         | Factor VIII      | No sequelae                                         |
| Kirwan et al <sup>56</sup>     | V  | Case report | 1    | M | 120 | Torticollis, limb paresis                                                       | C5-T1, lateral                                                  | Arteriovenous malformation           | Laminectomy      | No sequelae                                         |
| Kitagawa et al <sup>57</sup>   | V  | Case report | 1    | F | 144 | Back pain, paraplegia, anesthesia below T4, sphincter dysfunction               | T1-T3, latero-posterior                                         | Arteriovenous malformation           | Laminectomy      | Paraparesis                                         |
| Kotilainen et al <sup>58</sup> | V  | Case report | 1    | M | 156 | Pain, paresthesia                                                               | L4-L5, lateral                                                  | Trivial trauma                       | Laminectomy      | No sequelae                                         |
| Kubota et al <sup>59</sup>     | V  | Case report | 1    | M | 4   | Irritability, hemiplegia                                                        | C4-S1, posterior                                                | Hemophilia A (unknown)               | Factor VIII      | No sequelae                                         |
| Lannum et al <sup>60</sup>     | V  | Case report | 1    | M | 204 | Back pain, paraplegia, anesthesia below T6                                      | T2-T3, posterior                                                | Arterio-venous fistula               | Laminectomy      | Paraparesis                                         |
| Lee et al <sup>61</sup>        | V  | Case report | 1    | M | 4   | Irritability, torticollis, tetraplegia                                          | C4-T4, latero-posterior                                         | None                                 | Laminectomy      | No sequelae                                         |
| Lee et al <sup>62</sup>        | V  | Case report | 1    | M | 32  | Torticollis, paraplegia                                                         | C4-T3, posterior                                                | None                                 | Laminectomy      | No sequelae                                         |
| Lehman et al <sup>63</sup>     | V  | Case report | 1    | M | 144 | Back pain, paraplegia, hypoesthesia below T4                                    | C7-T4, posterior                                                | Trivial trauma                       | Laminectomy      | Paraplegia                                          |
| Lepintre et al <sup>64</sup>   | IV | Case series | 3; 3 |   |     | 100% tetraplegia; 33% torticollis, sphincter dysfunction                        | 1. C3-C7, posterior<br>2. C2-T2 posterior<br>3. C7-T1 posterior | 33% trivial trauma, hemophilia, none | 100% laminectomy | 66% no sequelae; 33% tetraplegia                    |
| Lepoivre et al <sup>65</sup>   | IV | Case series | 4; 1 | M | 180 | Back pain, paraplegia                                                           | C6-T1, posterior                                                | None                                 | Laminectomy      | No sequelae                                         |

|                             |    |             |       |        |              |                                                                                    |                                           |                       |                                 |                                                           |
|-----------------------------|----|-------------|-------|--------|--------------|------------------------------------------------------------------------------------|-------------------------------------------|-----------------------|---------------------------------|-----------------------------------------------------------|
| Liao et al <sup>66</sup>    | IV | Case series | 17; 1 | M      | 24           | Torticollis, tetraplegia                                                           | C2-T4, posterior                          | Trivial trauma        | Laminectomy                     | No sequelae                                               |
| Liao et al <sup>67</sup>    | IV | Case series | 35; 1 | F      | 7            | Irritability, paraplegia                                                           | C7-T7, posterior                          | None                  | Laminectomy                     | Paraplegia                                                |
| Licata et al <sup>68</sup>  | IV | Case series | 10; 1 | M      | 18           | Tetraparesis                                                                       | T1-T2                                     | None                  | Laminectomy                     | No sequelae                                               |
| Lim et al <sup>69</sup>     | V  | Case report | 1     | F      | 20           | Torticollis, paraparesis, sphincter dysfunction                                    | C7-T4, posterior                          | None                  | Laminectomy                     | Paraparesis                                               |
| Lo <sup>70</sup>            | IV | Case series | 2     | 100% M | 102 / 72-132 | 100%: paraplegia, anesthesia, sphincter dysfunction; 50% back pain                 | 1. T3-T5, posterior<br>2. C7-T4 posterior | 100% hemangioma       | 100% laminectomy                | 100% paraparesis; 50% sphincter dysfunction, hypoesthesia |
| Matsume et al <sup>71</sup> | V  | Case report | 1 / 2 | M      | 156          | 100% limb pain, paraparesis, hypoesthesia, sphincter dysfunction; 50% paraplegia   | 1. NA<br>2. C4-C7 posterior               | 50% NA, none          | 50% conservatively, laminectomy | 50% no sequelae, paraparesis                              |
| Mayer et al <sup>72</sup>   | IV | Case series | 4; 1  | F      | 204          | Back pain, paraplegia, Horner syndrome                                             | C7-T1, posterior                          | Angioma               | Laminectomy                     | Paraplegia                                                |
| Min et al <sup>73</sup>     | V  | Case report | 1     | M      | 8            | Irritability, paraplegia                                                           | C7-T3, posterior                          | Vascular malformation | Laminectomy                     | No sequelae                                               |
| Miyagi et al <sup>74</sup>  | V  | Case report | 1     | M      | 192          | Torticollis, tetraplegia, hypoesthesia below C4                                    | C2-C6, posterior                          | Vascular malformation | Laminectomy                     | No sequelae                                               |
| Morsing et al <sup>75</sup> | V  | Case report | 1     | M      | 13           | Irritability, torticollis, back pain, abdominal pain, paraparesis, Horner syndrome | C1-sacrum, posterior                      | Hemophilia A          | Factor VIII                     | No sequelae                                               |
| Muhonen et al <sup>76</sup> | V  | Case report | 1     | M      | 22           | Irritability, tetraparesis                                                         | C5-T2, posterior                          | Vascular malformation | Laminectomy                     | No sequelae                                               |
| Nagel et al <sup>77</sup>   | V  | Case report | 1     | F      | 84           | Torticollis, back pain,                                                            | C4-C5, posterior                          | Trivial trauma        | Laminectomy                     | No sequelae                                               |

|                                     |    |             |      |           |               |                                                                   |                                            |                                                |                    |                                   |
|-------------------------------------|----|-------------|------|-----------|---------------|-------------------------------------------------------------------|--------------------------------------------|------------------------------------------------|--------------------|-----------------------------------|
|                                     |    |             |      |           |               | limb pain, paresis                                                |                                            |                                                |                    |                                   |
| Narawong et al <sup>78</sup>        | IV | Case series | 2; 2 | 50% M, NA | 28 / 8-48     | 100% torticollis; 50% back pain, limb pain, irritability          | 1. T1-T5, posterior<br>2. C2-T3, posterior | 50% hemophilia A+ trivial trauma, hemophilia A | 100% factor VIII   | 100% no sequelae                  |
| Nayak et al <sup>79</sup>           | V  | Case report | 1    | F         | 144           | Back pain, paraplegia, anesthesia below T4, sphincter dysfunction | C7-T3, posterior                           | None                                           | Laminectomy        | Paraparesis, anesthesia below T10 |
| Nichols et al <sup>80</sup>         | V  | Case report | 1    | M         | 180           | Back pain, paraplegia, anesthesia below T4                        | C6-T1, posterior                           | Vascular malformation                          | Laminectomy        | No sequelae                       |
| Nirupam et al <sup>81</sup>         | V  | Case report | 1    | M         | 108           | Abdominal pain, paraplegia, anesthesia, sphincter dysfunction     | C6-T12, posterior                          | Hemophilia B                                   | Factor IX, surgery | Death                             |
| Noth et al <sup>82</sup>            | V  | Case report | 1    | M         | 6             | Irritability, torticollis, upper paraplegia, lower paraparesis    | C2/3-T6, posterior                         | Hemophilia A                                   | Factor VIII        | No sequelae                       |
| Ohegbulam et al <sup>83</sup>       | IV | Case series | 3; 1 | M         | 180           | Back pain, limb pain                                              | L3-L4, latero-posterior                    | Trivial trauma                                 | Conservatively     | No sequelae                       |
| Oymak et al <sup>84</sup>           | V  | Case report | 1    | M         | 10            | Irritability, torticollis, paraparesis                            | C1-conus, posterior                        | Hemophilia A                                   | Factor VIII, VIIa  | No sequelae                       |
| Packer et al <sup>85</sup>          | IV | Case series | 2; 1 | 50% M, F  | 180 / 156-204 | 100% back pain, paraplegia, anesthesia                            | 1. C7-T7<br>2. T9, posterior               | 100% vascular malformation                     | 100% laminectomy   | 50% no sequelae, paraparesis      |
| Pai et al <sup>86</sup>             | V  | Case report | 1    | M         | 15            | Irritability, upper paraplegia, lower paraparesis                 | C4-T3, posterior                           | None                                           | Laminotomy         | No sequelae                       |
| Paraskevopoulos et al <sup>87</sup> | V  | Case report | 1    | M         | 96            | Paraplegia                                                        | C6-T2, posterior                           | Vascular malformation                          | Laminectomy        | Paraparesis                       |
| Patel et al <sup>88</sup>           | V  | Case report | 1    | M         | 18            | Irritability, torticollis,                                        | C1-T2, posterior                           | None                                           | Laminectomy        | Tetraparesis                      |



|                             |    |             |       |              |               |                                                                   |                                             |                          |                                 |                                                        |
|-----------------------------|----|-------------|-------|--------------|---------------|-------------------------------------------------------------------|---------------------------------------------|--------------------------|---------------------------------|--------------------------------------------------------|
|                             |    |             |       |              |               | upper paraplegia, lower paraparesis                               |                                             |                          |                                 |                                                        |
| Patel et al <sup>89</sup>   | IV | Case series | 2; 2  | 50% M; 50% F | 35; / 22- 48  | 50% irritability, paraparesis, torticollis                        | 1. C7-T10, posterior<br>2. C7-T1, anterior  | 50% none, trivial trauma | 50% laminectomy, conservatively | 100% no sequelae                                       |
| Pear <sup>90</sup>          | IV | Case series | 8; 1  | M            | 180           | Back pain, paraparesis                                            | T5-T7                                       | Trivial trauma           | Laminectomy                     | No sequelae                                            |
| Pecha et al <sup>91</sup>   | V  | Case report | 1     | M            | 168           | Back pain, lower paraplegia, upper paraparesis                    | T1-T4, posterior                            | None                     | Laminectomy                     | Paraparesis                                            |
| Per et al <sup>92</sup>     | IV | Case series | 10; 1 | M            | 60            | Torticollis, back pain                                            | C3-T2, posterior                            | Hemophilia A             | Factor VIII                     | No sequelae                                            |
| Poonai et al <sup>93</sup>  | V  | Case report | 1     | F            | 11            | Irritability, paraplegia                                          | C4-T3, posterior                            | None                     | Laminectomy                     | Paraparesis                                            |
| Posnikoff <sup>94</sup>     | V  | Case report | 1     | F            | 30            | Irritability, torticollis, back pain, tetraparesis                | C5-T5, posterior                            | None                     | Laminectomy                     | No sequelae                                            |
| Rajz et al <sup>95</sup>    | IV | Case series | 17; 2 | 100% F       | 144 / 120-168 | 100% back pain, paraplegia; 50% hypoesthesia                      | 1. T2-T4, posterior<br>2. T9-T11, posterior | 100% trivial trauma      | 100% laminectomy                | 50% no sequelae, paraparesis                           |
| Ramelli et al <sup>96</sup> | IV | Case series | 2; 2  | 50% M, F     | 84,5 / 7-162  | 50% irritability, back pain, paraplegia, tetraplegia              | 1. C5-T2, posterior<br>2. C6-T7, posterior  | 50% synovial cyst, none  | 100% laminectomy                | 50% paraparesis, paraplegia                            |
| Rao et al <sup>97</sup>     | V  | Case report | 1     | M            | 204           | Paraparesis                                                       | L4-L5                                       | Trivial trauma           | Laminectomy                     | No sequelae                                            |
| Rathi <sup>98</sup>         | V  | Case report | 1     | M            | 3             | Tetraparesis, hypoesthesia, sphincter dysfunction                 | C2-T5, posterior                            | Hemophilia A (unknown)   | Factor VIII                     | No sequelae                                            |
| Ratre et al <sup>99</sup>   | V  | Case report | 1     | M            | 168           | Back pain, paraplegia, anesthesia below T4, sphincter dysfunction | T1-T2, anterior                             | None                     | Laminectomy                     | Paraplegia, anesthesia below T4, sphincter dysfunction |

|                                 |    |             |       |   |     |                                                                              |                       |                               |                                   |                                                                        |
|---------------------------------|----|-------------|-------|---|-----|------------------------------------------------------------------------------|-----------------------|-------------------------------|-----------------------------------|------------------------------------------------------------------------|
| Ravid et al <sup>100</sup>      | V  | Case report | 1     | F | 120 | Limb pain, paresis, hypoesthesia                                             | C6-T1, antero-lateral | Trivial trauma                | Laminectomy                       | No sequelae                                                            |
| Rebello et al <sup>101</sup>    | V  | Case report | 1     | M | 132 | Torticollis, back pain, tetraplegia                                          | C3-C7, posterior      | Trivial trauma                | Laminectomy                       | Paraparesis                                                            |
| Robertson et al <sup>102</sup>  | V  | Case report | 1     | F | 72  | Back pain, paraplegia, hypoesthesia below T4                                 | T1-T3                 | None                          | Laminectomy                       | Paraparesis                                                            |
| Rois et al <sup>103</sup>       | V  | Case report | 1     | M | 156 | Back pain, paraparesis                                                       | T5-T6, posterior      | Hemophilia A + trivial trauma | Factor VIII, laminectomy          | No sequelae                                                            |
| Rosenberg et al <sup>104</sup>  | V  | Case report | 1     | F | 168 | Back pain, paraparesis, sphincter dysfunction                                | T3-T5, posterior      | Trivial trauma                | Laminectomy                       | No sequelae                                                            |
| Sandvik et al <sup>105</sup>    | V  | Case report | 1     | M | 12  | Paraplegia                                                                   | C6-T7, posterior      | Cavernous angioliopoma        | Laminotomy                        | No sequelae                                                            |
| Sankar et al <sup>106</sup>     | V  | Case report | 1     | M | 48  | Torticollis                                                                  | C2-C7, anterior       | Hemophilia B (unknown)        | Factor IX                         | NA                                                                     |
| Scheil et al <sup>107</sup>     | IV | Case series | 7; 1  | M | 192 | Torticollis, back pain, tetraplegia, anesthesia below T3                     | C7-T2, posterior      | None                          | Laminectomy                       | No sequelae                                                            |
| Schoonjans et al <sup>108</sup> | V  | Case report | 1     | M | 8   | Irritability, paraplegia, sphincter dysfunction                              | C5-L1, posterior      | None                          | Laminectomy                       | Tetraparesis                                                           |
| Scott <sup>109</sup>            | V  | Case report | 1     | F | 108 | Back pain, limb pain, paraplegia, anesthesia below T4, sphincter dysfunction | T1-T4, posterior      | None                          | Laminectomy                       | No sequelae                                                            |
| Sheikh et al <sup>110</sup>     | V  | Case report | 1     | M | 84  | Back pain, hemiparesis                                                       | C3-L5, posterior      | Hemophilia B, trivial trauma  | Factor IX                         | No sequelae                                                            |
| Shenkin et al <sup>111</sup>    | V  | Case report | 1     | M | 20  | Irritability, paraplegia                                                     | C7-T7                 | None                          | Laminectomy                       | No sequelae                                                            |
| Shin et al <sup>112</sup>       | IV | Case series | 14; 1 | M | 204 | Tetraplegia, anesthesia                                                      | C5-C6, posterior      | None                          | Laminectomy                       | Tetraparesis                                                           |
| Shin et al <sup>113</sup>       | V  | Case report | 1 / 3 | F | 192 | 100% torticollis, pain; 33%                                                  | C7-T2 anterior        | None                          | 66% laminectomy, 33% conservative | 66% no sequelae; 33% paraparesis, sphincter dysfunction, syringomyelia |

|                                  |    |             |      |                 |              |                                                                                                       |                                           |                                        |                             |                                   |
|----------------------------------|----|-------------|------|-----------------|--------------|-------------------------------------------------------------------------------------------------------|-------------------------------------------|----------------------------------------|-----------------------------|-----------------------------------|
|                                  |    |             |      |                 |              | tetraparesis, hypoesthesia below C7, sphincter dysfunction                                            |                                           |                                        |                             |                                   |
| Sivakumaran et al <sup>114</sup> | IV | Case series | 2; 2 |                 |              | 100% sphincter dysfunction<br>50% torticollis, back pain, tetraparesis, paraplegia,                   | 1. C4/5-C7/T1, posterior<br>2. C7/T1-T4/5 | 100% arteriovenous malformation        | 50% laminectomy, laminotomy | 50% no sequelae, paraparesis      |
| Soundappan et al <sup>115</sup>  | V  | Case report | 1    | F               | 11           | Irritability, torticollis, paraplegia                                                                 | C6-T7, posterior                          | Trivial trauma                         | Laminectomy                 | Paraparesis, Horner syndrome      |
| Stanley et al <sup>116</sup>     | V  | Case report | 1    | M               | 156          | Back pain, limb pain, paraparesis, hypoesthesia below T8                                              | T5-T8, anterior                           | Hemophilia A (unknown), trivial trauma | Factor VIII, laminectomy    | No sequelae                       |
| Tagaya et al <sup>117</sup>      | V  | Case report | 1    | M               | 4            | Irritability, hemiparesis                                                                             | C2/3-L2, posterior                        | Hemophilia A (unknown)                 | Factor VIII                 | No sequelae                       |
| Tamura et al <sup>118</sup>      | V  | Case report | 1    | M               | 60           | Torticollis, paraparesis, sphincter dysfunction                                                       | C7-T1, latero-posterior                   | Hemophilia A                           | Factor VIII, laminectomy    | Paraparesis                       |
| Tender et al <sup>119</sup>      | V  | Case report | 1    | F               | 144          | Torticollis, tetraparesis, sphincter dysfunction                                                      | C6-T2, posterior                          | None                                   | Laminectomy                 | No sequelae                       |
| Tewari et al <sup>120</sup>      | IV | Case series | 3; 3 | 66% M;<br>33% F | 96 / 60-132  | 100% sphincter dysfunction;<br>66% torticollis, back pain, tetraplegia;<br>33% limb pain, paraparesis | 1. C4-C7<br>2. C5-T4<br>3. T10-L4         | 66% none;<br>33% trivial trauma        | 100% laminectomy            | 66% tetraparesis; 33% paraparesis |
| Travis et al <sup>121</sup>      | V  | Case report | 1    | M               | 20           | Irritability, paraparesis                                                                             | C5-Cauda equina                           | Hemophilia A                           | Factor VIII, laminectomy    | No sequelae                       |
| Valladares <sup>122</sup>        | IV | Case series | 2; 2 | 50% M, F        | 31,5 / 30-33 | 50% paraplegia, tetraplegia                                                                           | 1. T3-T5<br>2. C7-T3                      | 50% none, trivial trauma               | 100% laminectomy            | 50% no sequelae, tetraparesis     |

|                                   |     |                                    |      |  |          |              |                                                            |                                                            |                                                       |                               |                  |
|-----------------------------------|-----|------------------------------------|------|--|----------|--------------|------------------------------------------------------------|------------------------------------------------------------|-------------------------------------------------------|-------------------------------|------------------|
| Vallee et al <sup>123</sup>       | V   | Case report                        | 1    |  | F        | 22           | Irritability, torticollis, tetraparesis                    | C5-T1                                                      | None                                                  | Laminectomy                   | No sequelae      |
| Van Heeswijk et al <sup>124</sup> | V   | Case report                        | 1    |  | F        | 48           | Torticollis, paresis                                       | C2-C6, posterior                                           | None                                                  | Laminectomy                   | No sequelae      |
| Ventureyra et al <sup>125</sup>   | V   | Case report                        | 1    |  | M        | 96           | Back pain, paraplegia, sphincter dysfunction               | T1-T3, posterior                                           | Trivial trauma                                        | Laminectomy                   | No sequelae      |
| Visconti et al <sup>126</sup>     | IV  | Case series                        | 8; 1 |  | NA       | 84           | Paraplegia, sphincter dysfunction                          | NA                                                         | Hemophilia A+B + trivial trauma                       | Factor VIII, IX,              | Paraparesis      |
| Williams et al <sup>127</sup>     | IV  | Case series                        | 2; 1 |  | F        | 84           | Torticollis, tetraparesis, Horner syndrome                 | C4-T2, latero-posterior                                    | None                                                  | Laminectomy                   | Tetraparesis     |
| Wittebol et al <sup>128</sup>     | IV  | Case series                        | 4; 1 |  | F        | 72           | Torticollis, back pain, tetraplegia, sphincter dysfunction | C6-T5, posterior                                           | None                                                  | Laminectomy                   | Tetraparesis     |
| Yildiz et al <sup>129</sup>       | V   | Case report                        | 1    |  | F        | 96           | Back pain, paraplegia, sphincter dysfunction               | T2-T4, latero-anterior                                     | None                                                  | Laminectomy                   | No sequelae      |
| Zhong et al <sup>130</sup>        | V   | Case report                        | 1    |  | M        | 84           | Torticollis, paraparesis                                   | C2-T1, anterior                                            | Hemophilia B + trivial trauma                         | Factor IX                     | No sequelae      |
| Presenting cases                  | III | Systematic reviews of case studies | 2    |  | 50% M, F | 69,5 / 55-84 | 100% torticollis; 50% tetraparesis, sphincter dysfunction  | 1. C2/3-T1, latero-posterior<br>2. C3-C5, latero-posterior | 50% arteriovenous malformation + trivial trauma, none | 50% laminectomy, conservative | 100% no sequelae |

NA = Not available

## Alphabetical reference list of cases

1. Abbas A, Afzal K, Mujeeb AA, et al. Spontaneous ventral spinal epidural hematoma in an infant: An unusual presentation. *Iran J Child Neurol* 2013;7:47-50.

2. Abdelaal MA, McGuinness FE, Sagar G. Case report: spinal extradural haematoma in haemophilia A – A diagnosis not to be missed. *Clin Radiol* 1994;49:573-75.
3. Abram HS, DeLaHunt MJ, Merinbaum DJ, et al. Recurrent spontaneous spinal epidural hematoma in a child: First case report. *Pediatr Neurol* 2007;36:177-80.
4. Agha BS, Tehan C, Perno J. Torticollis, not always the usual suspects. *Pediatr Emerg Care* 2011;27:32-33.
5. Amyot R, Hardy J, Chagnon J, et al. Hématome epidural rachidien spontané chez un enfant de 22 mois. *L'Union médicale du Canada*. 1969;98:1302-06.
6. Arya R, Jain P, Kumar A, Gulati S. Spontaneous Spinal Epidural Hematoma in an Infant. *J Child Neurol* 2012;27:1577-79.
7. Awada A, Russel N, Al Fayed N, et al. Spontaneous cervical epidural hematoma: case report. *Spinal Cord* 1998;36:71-72.
8. Azumagawa K, Yamamoto S, Tanaka K, et al. Non-operative treated spontaneous spinal epidural hematoma in a 12-year-old boy. *Pediatr Emerg Care* 2012;28:167-69.
9. Balkan C, Kavakli K, Karapinar D. Spinal epidural haematoma in a patient with haemophilia B: case report. *Haemophilia* 2006;12:437-40.
10. Bisson EF, Dumont T, Tranmer B. Spontaneous spinal epidural hematoma in a child with hemophilia B. *Can J Neurol Sci* 2007;34:488-90.
11. Blount J, Doughty K, Tubbs RS, et al. In utero spontaneous cervical thoracic epidural hematoma imitating spinal cord birth injury. *Pediatr Neurosurg* 2004;40:23-27.
12. Borkar SA, Prasad GL, Dutta Satyarthee G, et al. Spontaneous spinal extradural hematoma in a child with haemophilia B, surgery or medical management – A dilemma? *J Pediatr Neurosci* 2011;6:131-33.
13. Cabral AJ, Barros A, Aveiro C, et al. Spontaneous spinal epidural haematoma due to arteriovenous malformation in a child. *BMJ Case Reports*. 2011:1-4.
14. Cakir E, Karaarslan G, Usul H, et al. Clinical course of spontaneous spinal epidural haematoma mimicking Guillain-Barré syndrome in a child: a case report and literature review. *Devel Med Child Neurol* 2004;46:838-42.
15. Caldarelli M, Di Rocco C, La Marca F. Spontaneous spinal epidural hematoma in toddlers : Description of two cases and review of the literature. *Surg Neurol* 1994;41:325-29.
16. Carrea R, Girado M, Eurnekian A. Hematoma cronico epidural y subdural espinal, relato de tres casos y analisis de la literatura sobre el tema. *Medicina* 1954;14:379-97.
17. Chang CW, Lin LH, Liao HT, et al. Spontaneous spinal epidural hematoma in a 5-year-old girl: case reports. *Acta Paediatr Taiwan* 2002;43:345-47.
18. Chrétiennot-Bara C, Guët A, Balzamo E, et al. Hématome épidual chez l'enfant hémophile: difficultés diagnostiques. *Arch de Pédiatr* 2001;8:828-33.
19. Cirk B, Guven MB, Akalan N. Spontaneous spinal epidural hematoma. *American Congress of Rehabilitation Medicine and the American Academy of Physical Medicine and Rehabilitation* 1999;80:125.
20. Cooper DW. Spontaneous spinal epidural hematoma: Case report. *Journal Neurosurg* 1966;26:343-45.
21. Cromwell LD, Kerber C, Ferry PC. Spinal cord compression and hematoma: An unusual complication in a hemophiliac infant. *Am J Roentgenol* 1977;128:847-49.
22. Cuvelier GDE, Davis JH, Purves EC, et al. Torticollis as a sign of cervico-thoracic epidural haematoma in an infant with severe haemophilia A. *Haemophilia* 2006;12:683-86.

23. Dauch WA. Spinale Epidural-hämatome bei Kindern und Jugendlichen. *Neurochirurgia* 1986;29:83-89.
24. Dawson BH. Paraplegia due to spinal epidural haematoma. *J Neurol Neurosurg Psychiatr* 1963;26:171-73.
25. Doymaz S, Schneider J. Spontaneous spinal epidural hematoma in a teenage boy with cholestasis: A case report. *Pediatr Emerg Care* 2013;29:227-29.
26. Erkutlu I, Bay A, Aktekin E. Conservative management of an acute spinal epidural hemorrhage in a child with hemophilia A with inhibitor. *Blood Coagul Fibrinolysis* 2016;27:930-32.
27. Fok WM, Sun LK, Wong NM, et al. Spontaneous spinal epidural haematoma in a 15-month-old boy presenting with a wry neck: a case report. *J Orthopaed Surg* 2007;15:373-75.
28. Fruchtman Y, Dardik R, Barg AA, et al. Spinal epidural hematoma following cupping glass treatment in an infant with hemophilia A. *Pediatr Blood Cancer* 2016;63:1120-22.
29. Gelabert M, Iglesias M, Gonzalez J, et al. Hematoma epidural espinal espontaneo: revision de 8 casos. *Neurologia* 2003;18:357-63.
30. Ghanem Q, Ivan LP. Spontaneous spinal epidural hematoma in an 8-year-old boy. *Neurology* 1978;28:829-32.
31. Grollmus J, Hoff J. Spontaneous spinal epidural haemorrhage: good results after early treatment. *J Neurol Neurosurg Psychiatr* 1975;38:89-90.
32. Gupta V, Kundra S, Chaudhary AK, et al. Cervical epidural hematoma in a child. *J Neurosci Rural Practice* 2012;3:217-18.
33. Güzel A, Simsek O, Karasalihoglu S, et al. Spontaneous spinal epidural hematoma after seizure: A case report. *Clin Pediatr* 2007;46:263-65.
34. Hamre MR, Haller JS. Intraspinal hematomas in hemophilia. *Am J Pediatr Hematol/Oncol* 1992;14:166-69.
35. Hasni Bouraoui I, Dhahbi MK, Arifa N, et al. L'hématome spontané épidual rachidien : à propos de 3 cas. *J Radiol* 2009;90:499-502.
36. Heer JS, Enriquez EG, Carter AJ. Spinal epidural hematoma as first presentation of hemophilia A. *Journal Emerg Med* 2008;34:159-62.
37. Hehman K, Norrell H. Massive chronic spinal epidural hematoma in a child. *Am J Dis Child* 1968;116:308-10.
38. Horcajadas A, Katati M, Arraez MA, et al. Hematoma epidural espinal espontaneo: presentacion de 2 casos y revision de la bibliografia. *Neurologia* 1998;13:410-404.
39. Hosoki K, Kumamoto T, Kasai Y, et al. Infantile spontaneous spinal epidural hematoma. *Pediatr Internat* 2010;52:507-8.
40. Hutt PJ, Herold ED, Koenig BM, et al. Spinal extradural hematoma in an infant with hemophilia A: An unusual presentation of a rare complication. *J Pediatr* 1996;128:704-6.
41. Iguchi T, Ito Y, Asai M, et al. A case of spontaneous spinal epidural hematoma. *No to Hattatsu* 1993;25:267-70.
42. Iizuka Y, Iizuka H, Nagano K, et al. Laminoplasty preserving the deep extensor musculature for a pediatric cervicothoracic epidural hematoma case of haemophilia A. *J Pediatr Orthoped* 2014;23:584-88.
43. Irwin SL, Attia MW. Atraumatic spinal epidural hematoma in an infant with hemophilia A. *Pediatr Emerg Care* 2001;17:40-41.

44. Iwamuro H, Morita A, Kawaguchi H, et al. Resolution of spinal epidural haematoma without surgery in a haemophilic infant. *Acta Neurochirurg* 2004;146:1263-65.
45. Jackson R. Case of spinal apoplexy. *Lancet*. 1869;3:5-6.
46. Jackson FE. Spontaneous spinal epidural hematoma coincident with whooping cough. Case report. *J Neurosurg* 1963;20:715-17.
47. Johnston LM. Epidural hemangioma with compression of spinal cord. *JAMA* 1938;11:119-21.
48. Jones RK, Knighton RS. Surgery in Hemophiliacs with Special Reference to the Central Nervous System. *Annals of Surgery* 1956;December:1029-1034.
49. Joseph AP, Vinen JD. Acute spinal epidural hematoma. *J Emerg Med* 1993;11:437-41.
50. Jost W, Graf N, Pindur G, et al. Intraspinal, extradural Blutung bei einem 7 jährigen Jungen mit Hämophilie B. *Monatsschrift Kinderheilkunde* 1990;138:36-37.
51. Jumani DB, Littlewood R, Iyer A, et al. Spontaneous spinal epidural haematoma mimicking meningitis in a 2-year-old child-a case report and literature review. *Child Nerv Syst* 2013;29:1795-98.
52. Kalina P, Morris J, Raffel C. Spinal epidural hematoma in an infant as the initial presentation of severe hemophilia. *Emerg Radiol* 2008;15:281-84.
53. Khurshed N, Makhdoomi R, Geelani S, et al. Spinal epidural hematoma in a hemophilic child: Case report and literature review. *Neurosurg Quart* 2013;23:222-23.
54. Khurshed N, Makhdoomi R, Tanki H, et al. Spinal epidural hematomas in fast bowlers: Report of two unusual cases. *Pediatr Neurosurg* 2013;49:303-6.
55. Kiehna EN, Waldron PE, Jane Jr JA. Conservative management of an acute spontaneous holocord epidural hemorrhage in a hemophilic infant: case report. *J Neurosurg Pediatr* 2010;6:43-48.
56. Kirwan R, Saigal G, Faingold R, et al. Nontraumatic acute and subacute enhancing spinal epidural hematoma mimicking a tumor in a child. *Pediatr Radiol* 2004;34:499-502.
57. Kitagawa RS, Mawad ME, Whitehead WE, et al. Paraspinal arteriovenous malformations in children. *J Neurosurg Pediatr* 2009;3:425-28.
58. Kotilainen EM, Pajulo O. Spontaneous epidural hematoma as a cause of sciatic pain in a schoolboy. *Pediatr Neurol* 1997;17:350-52.
59. Kubota T, Miyajima Y. Spinal extradural haematoma due to haemophilia A. *Arch Dis Child* 2007;92:498.
60. Lannum S, Stratton J. Spontaneous epidural hematoma of the thoracic spine in a 17-year-old adolescent boy: a case report. *Am J Emerg Med* 2009;27:628.e5-e6.
61. Lee JS, Yu CY, Huang KC, et al. Spontaneous spinal epidural hematoma in a 4-month-old infant. *Spinal Cord* 2007;45:586-90.
62. Lee CH, Song GS, Kim YH, et al. Spontaneous spinal epidural hematoma coexisting Guillan-Barré syndrome in a child: A case report. *Korean J Spine* 2016;13:167-69.
63. Lehman AAR, McKenna ME, Wisneski R, et al. Delayed presentation of a traumatic spinal epidural hematoma in a preadolescent: A case report. *J Bone Joint Surg* 2011;93:1-4.
64. Lepintre J, Despres P, Rendu, Seringe P. Hématome intra-rachidien extra-dural de siège cervical. *Annales de pédiatrie* 1969;16:723-27.

65. Lepoire J, Tridon P, Montaut J, et al. L'hématome extradural rachidien spontané. *Neurochirurgie* 1959;7:298-313.
66. Liao CC, Hsieh PC, Lin TK, et al. Surgical treatment of spontaneous spinal epidural hematoma: a 5-year experience. *J Neurosurg Spine* 2009;11:480-86.
67. Liao CC, Lee ST, Hsu WC, et al. Experience in the surgical management of spontaneous spinal epidural hematoma. *J Neurosurg Spine* 2004;100:38-45.
68. Licata C, Zoppetti MC, Perini SS, et al. Spontaneous spinal haematomas. *Acta Neurochirurg* 1988;95:126-30.
69. Lim JJ, Yoon SH, Cho KH, et al. Spontaneous spinal Epidural hematoma in an infant : A case report and review of the literature. *J Korean Neurosurg* 2008;44:84-87.
70. Lo MD. Spinal cord injury from spontaneous epidural hematoma. Report of 2 cases. *Pediatr Emerg Care* 2010;26:445-47.
71. Matsumae M, Shimoda M, Shibuya N, et al. Spontaneous cervical epidural hematoma. *Surg Neurol* 1987;28:381-84.
72. Mayer JA. Extradural spinal hemorrhage. Case report. *Canadian Med Assoc J* 1963;89:1034-37.
73. Min S, Duan Y, Zhang L. Chronic spontaneous cervicothoracic epidural hematoma in a 8-month-old infant. *Ann Saudi Med* 2011;31:301-4.
74. Miyagi Y, Miyazono M, Kamikaseda K. Spinal epidural vascular malformation presenting in association with a spontaneously resolved acute epidural hematoma. Case report. *J Neurosurg* 1998;88:909-11.
75. Morsing IE, Brons P, Draaisma JMT, et al. Hemophilia A and spinal epidural hematoma in children. *Neuropediatrics* 2009;40:245-48.
76. Muhonen MG, Piper JG, Moore SA, et al. Cervical epidural hematoma secondary to an extradural vascular malformation in an infant: Case report. *Neurosurgery* 1995;36:585-88.
77. Nagel MA, Taff IP, Cantos EL, et al. Spontaneous spinal epidural hematoma in a 7-year-old girl : Diagnostic value of magnetic resonance imaging. *Clin Neurol Neurosurg* 1989;91:157-60.
78. Narawong D, Gibbons VP, McLaughlin JR, et al. Conservative management of spinal epidural hematoma in haemophilia, Case reports. *Pediatr Neurol* 1988;4:169-71.
79. Nayak N, Baldawa S, Diyora B, et al. Delayed recovery of paraplegia following surgical evacuation of spontaneous cervicothoracic epidural hematoma. *Childs Nerv Syst* 2011;27:2031-32.
80. Nichols P, Manganiello LOJ. Extradural hematoma of the spinal canal. Report of a case. *Case Reports* 1956:638-40.
81. Nirupam N, Pemde H, Chandra J. Spinal epidural hematoma in a patient with hemophilia B presenting as acute abdomen. *Ind J Hematol Blood Transf* 2014;30:54-56.
82. Noth I, Hutter J, Meltzer PA, et al. Spinal epidural hematoma in a hemophilic infant. *Am J Pediatr Hematol/Oncol* 1993;15:131-34.
83. Ohaegbulam CO, Dunn IF, d'Hemecourt P, et al. Lumbar epidural hematoma associated with spondylolyses. Report of 3 cases. *J Neurosurg Spine* 2008;8:174-80.
84. Oymak Y, Muminoglu N, Ay Y, et al. Torticollis in a haemophilic infant with inhibitor: a case of spinal epidural haematoma. *Blood Coagulation Fibrinolysis* 2016;27:576-79.
85. Packer NP, Cummins BH. Spontaneous epidural haemorrhage: a surgical emergency. *Lancet* 18:356-58.



86. Pai SB, Maiya PP. Spontaneous spinal epidural hematoma in a toddler-a case report. *Childs Nerv Syst* 2006;22:526-29.
87. Paraskevopoulos D, Magras I, Polyzoidis K. Spontaneous spinal epidural hematoma secondary to extradural arteriovenous malformation in a child: a case-based update. *Childs Nerv Syst* 2013;29:1985-91.
88. Patel H, Garg BP. Increasing irritability with sudden onset of flaccid weakness. *Seminars Pediatr Neurol* 1996;3:192-97.
89. Patel H, Boaz JC, Phillips JP, et al. Spontaneous spinal epidural hematoma in children. *Pediatr Neurol* 1998;19:302-7.
90. Pear BL. Spinal epidural hematoma. *Radiol Conf Rocky Mountain Radiol Soc* 1972;115:155-65.
91. Pecha MD, Able AC, Barber DB, et al. Outcome after spontaneous spinal epidural hematoma in children : Case report and review of the literature. *Arch Physical Med Rehab* 1998;79:460-63.
92. Per H, Canpolat M, Tümtürk A, et al. Different etiologies of acquired torticollis in childhood. *Childs Nerv Syst* 2013;13:2302-06.
93. Poonai N, Rieder MJ, Ranger A. Spontaneous spinal epidural hematoma in an 11-month-old girl. *Pediatr Neurosurg* 2007;43:121-24.
94. Posnikoff J. Spontaneous spinal epidural hematoma of childhood. *J Pediatr* 1968;73:178-83.
95. Rajz G, Cohen JE, Harnof S, et al. Spontaneous spinal epidural hematoma: The importance of preoperative neurological status and rapid intervention. *J Clin Neurosci* 2015;22:123-28.
96. Ramelli GP, Boscherini D, Kehrl P, et al. Spontaneous spinal epidural hematomas in children : Can we prevent a negative prognosis ? Reflections on 2 cases. *J Child Neurol* 2008;23.
97. Rao BD, Rao KS, Subrahmanian MV, et al. Spinal epidural haemorrhage. *Br J Surg* 1966;53:649-50.
98. Rathi N, Rathi A. Haemophilia A presenting as spontaneous spinal epidural haematoma in a 3-month-old infant. *BMJ Case Reports* 2010;10:1-3.
99. Ratre S, Yadav Y, Choudhary S, et al. Spontaneous ventral spinal epidural hematoma in a child: A case report and review of literature. *J Neurosci Rural Practice* 2016;7:297-99.
100. Ravid S, Schneider S, Maytal J. Spontaneous spinal epidural hematoma: an uncommon presentation of a rare disease. *Childs Nerv Syst* 2002;18:345-47.
101. Rebello MD, Dastur HM. Spinal epidural haemorrhage. A review and two case reports. *Neurol India* 1966;14:135-45.
102. Robertson WC, Lee YE, Edmonson MB. Spontaneous spinal epidural hematoma in the young. *Neurology* 1979;29:120-22.
103. Rois PV, Lopez MR, Lopez de Vergara BC, et al. Spinal epidural hematoma in hemophilic children: controversies in management. *Childs Nerv Syst* 2009;25:987-91.
104. Rosenberg O, Itshayek E, Israel Z. Spontaneous spinal epidural hematoma in a 14-year-old girl: case report and review of the literature. *Pediatr Neurosurg* 2003;38:216-18.
105. Sandvik U, Svensdotter E, Gustavsson B. Spinal cavernous extradural angiolioma manifesting as spontaneous spinal epidural hematoma in a child. *Childs Nerv Syst* 2015;31:1223-26.
106. Sankar J, Srinivasan A, Ramakrishnan V, et al. An unusual cause of acute torticollis. *Clin Pediatr* 2009;48:784-95.

107. Scheil F, Larkamp U, Mutharoglu U. Das spontane spinale epidurale Hämatom. *Neurochirurgia* 1990;33:45-49.
108. Schoonjans AN, De Dooy J, Kenis S, et al. Spontaneous spinal epidural hematoma in infancy : Review of the literature and the seventh case report. *Eur J Paediatr Neurol* 2013;17:537-42.
109. Scott TE. Spinal epidural hemorrhage: Spontaneous and recurrent. *Southern Med J* 1958;51:1048-50.
110. Sheikh AA, Abildgaard CF. Medical management of extensive spinal epidural hematoma in a child with factor IX deficiency. *Pediatr Emerg Care* 1994;10:26-29.
111. Shenkin HA, Horn RC, Grant FC. Lesions of the spinal epidural space producing cord compression. *Arch Surg* 1945;51:140-42.
112. Shin J-J, Kuh S-U, Cho Y-E. Surgical management of spontaneous spinal epidural hematoma. *Eur Spine J* 2006;15:998-1004.
113. Shin Y-I, Yang C-Y, Joo M-C, et al. Spontaneous epidural hematoma recurred three times. *Neurorehabilitation* 2007;22:147-50.
114. Sivakumaran R, King A, Bodi I, et al. Spontaneous epidural spinal haematoma in children caused by vascular malformations. *Eur Spine J* 2016;25:614-18.
115. Soundappan SVS, Darwish B, Chaseling R. Traumatic spinal epidural hematoma – Unusual cause of torticollis in a child. *Pediatr Emerg Care* 2005;21:847-49.
116. Stanley P, McComb JG. Chronic spinal epidural hematoma in hemophilia A in a child. *Pediatr Radiol* 1983;13:241-43.
117. Tagaya A, Miyajima Y, Sakamoto M, et al. Spontaneous spinal epidural hematoma in an infant with undiagnosed hemophilia A. *Pediatr Internat* 2010;52:296-318.
118. Tamura K, Kanazawa T, Suzuki M, et al. Successful induction of immune tolerance by continuous infusion of recombinant factor VIII in a haemophilia A patient with high-inhibitor titres. *Haemophilia* 2006;12:100-2.
119. Tender GC, Awasthi D. Spontaneous cervical spinal epidural hematoma in a 12-year-old girl : Case report and review of the literature. *J Louisiana State Med Soc* 2004;156:196-98.
120. Tewari MK, Tripathi LN, Mathuriya SN, et al. Spontaneous spinal extradural hematoma in children: Report of three cases and review of the literature. *Childs Nerv Syst* 1992;8:53-55.
121. Travis SF, Greenbaum BH, Mintz M, et al. Epidural hematoma of the cauda equina in a child with hemophilia A. *J Pediatr Hematol/ Oncol* 1996;18:308-10.
122. Valladares HA. Spinal epidural hematoma. Report of 2 cases. *Neurochirurgia* 1972;30:236-43.
123. Vallee B, Besson G, Gaudin J, et al. Spontaneous spinal epidural hematoma in a 22-month-old girl. Case report. *J Neurosurg* 1982;56:135-38.
124. Van Heesewijk JPM, Casparie JWBM. Acute spontaneous spinal epidural haematoma in a child : case report. *Europ Radiol* 2000;10:1874-76.
125. Ventureyra ECG, Ghanem Q, Ivan LP. Spontaneous spinal epidural haematoma in a youngster. *Child's Brain* 1979;5:103-8.
126. Visconti EB, Hilgartner MW. Recognition and management of central nervous system hemorrhage in hemophilia. *Paediatrician* 1980;9:127-37.
127. Williams CE, Nelson M. The varied computed tomographic appearances of acute spinal epidural haematoma. *Clin Radiol* 1987;38:363-65.

128. Wittebol MC, Van Veelen CWM. Spontaneous spinal epidural haematoma : Etiological considerations. *Clin Neurol Neurosurg* 1984;86:265-70.
129. Yildiz S, Dokumaci DS, Boyaci N, et al. Spontaneous thoracic epidural hematoma mimicking spinal mass. *The spine journal* 2014;14.
130. Zhong W, Chen H, You C, et al. Spinal epidural hematoma in a child with hemophilia B. *Neurol India* 2011;59:294-96.
